# Supplementary material for: Identification of anti-Gram-negative bacteria agents targeting the interaction between ribosomal proteins L12 and L10
Source: PubMed Central journal article supplement — Acta Pharm Sin B. 2018 Jul 30;8(5):772–83. doi: 10.1016/j.apsb.2018.07.006 (PMC6146381; doi:10.1016/j.apsb.2018.07.006), 2018-07-30
Supplement: mmc2.pdf [file mmc2.pdf]

Supplementary Information

**Original article**

**Identification of anti-Gram-negative bacteria agents targeting the interaction between ribosomal proteins L12 and L10**

**Weiwei Wang<sup>a</sup>, Chao Liu<sup>a</sup>, Ningyu Zhu<sup>a</sup>, Yuan Lin<sup>b</sup>, Jiandong Jiang<sup>a, b</sup>, Yanchang Wang<sup>c</sup>, Yan Li<sup>a,\*</sup>, Shuyi Si<sup>a,\*</sup>**

*<sup>a</sup>Beijing Key Laboratory of Antimicrobial Agents, Institute of Medicinal Biotechnology, Peking Union Medical College and Chinese Academy of Medical Sciences, Beijing 100050, China*

*<sup>b</sup>State Key Laboratory of Bioactive Substances and Function of Natural Medicine, Institute of Materia Medica, Chinese Academy of Medical Sciences and Peking Union Medical College, Beijing 100050, China;*

*<sup>c</sup>Department of Biomedical Sciences, College of Medicine, Florida State University, Tallahassee, FL 32306, USA*

Received 5 May 2018; received in revised form 18 June 2018; accepted 5 July 2018

\*Corresponding authors. Tel./fax: +86 10 6318 0604.

E-mail addresses: sisymb@hotmail.com (Shuyi Si), [13391513480@163.com](mailto:13391513480@163.com) (Yan Li).

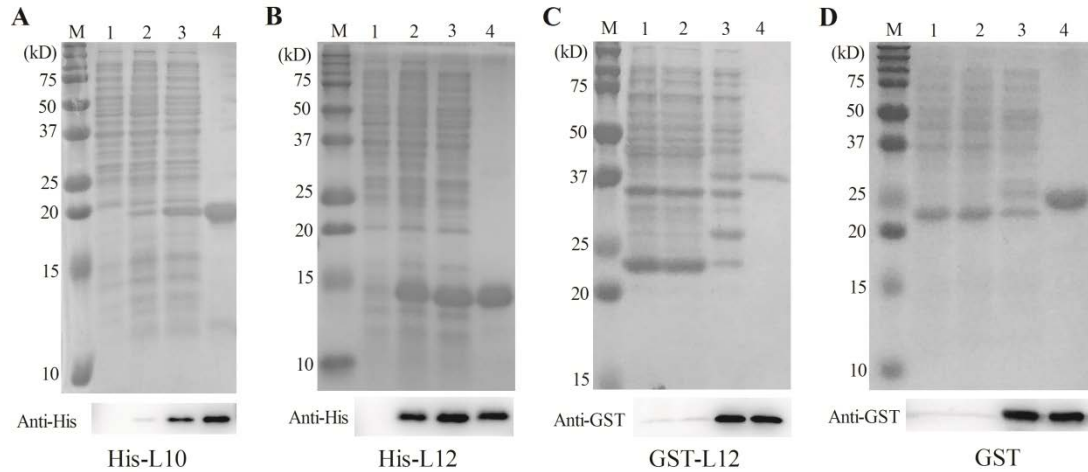

**Figure S1** The expression and purification of *E. coli* L12, L10, GST-L12 and GST proteins. Protein samples were separated by SDS-PAGE and protein levels are shown after coomassie blue staining. Lane M, protein marker; lane 1, total proteins from a control strain; lane 2, total proteins before induction; lane 3, the proteins from the supernatant of cell lysate after induction; 4, purified proteins. Lower panels show the western blot analysis of the proteins.

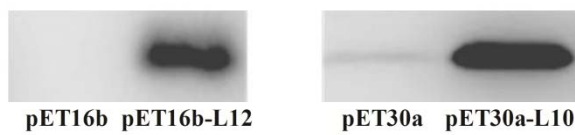

**Figure S2** The expression of L12 and L10 proteins in *E. coli* cells. *E. coli* cells with plasmids pET16b, pET16b-L12, pET30a, or pET30a-L10 were grown in the presence of induction agent IPTG, and the expression was detected using anti-His antibody.

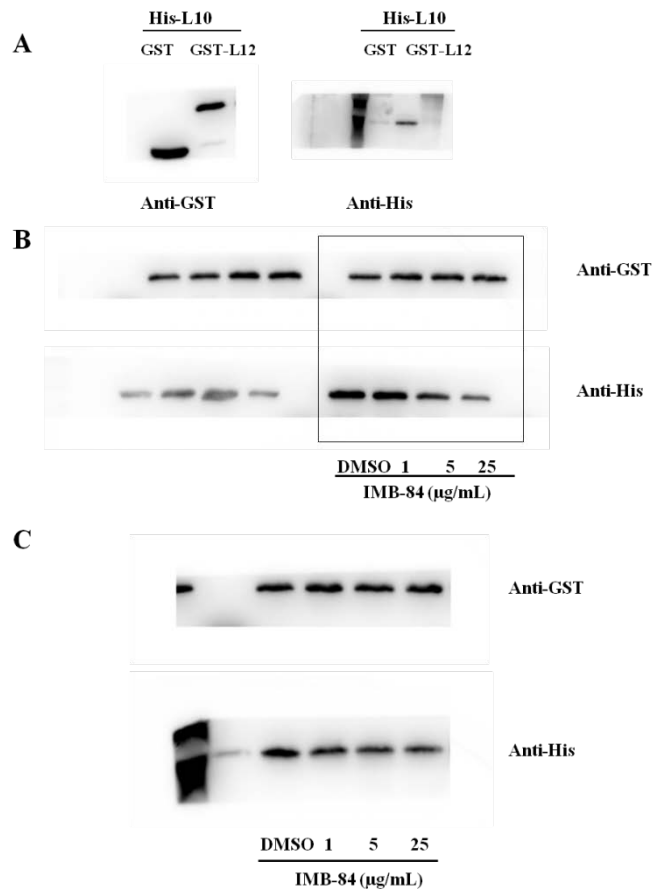

**Figure S3** Full lanes for the Western blotting results in Figure 3.
